# Supplementary material for: GW182 interaction with Argonaute is essential for miRNA-mediated translational repression and mRNA decay
Source: Springer Nature journal article supplement (doi:10.1038/nsmb.1405), 2008-03-16
Supplement: 41594_2008_BFnsmb1405_MOESM7_ESM.pdf [file 41594_2008_BFnsmb1405_MOESM7_ESM.pdf]

# GW182 interaction with Argonaute proteins is essential both for miRNA-mediated translational repression and mRNA decay

Ana Eulalio, Eric Huntzinger, and Elisa Izaurralde

## Supplementary Figure 1

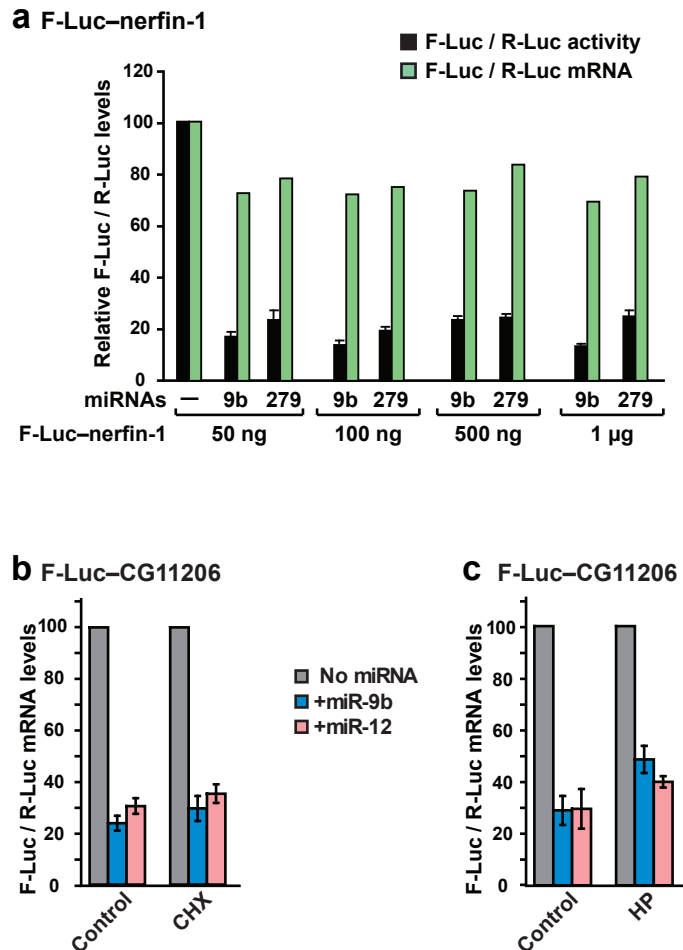

**Supplementary Figure 1** Different modes of miRNA-mediated gene silencing. (a) S2 cells were co-transfected with a mixture of three plasmids: plasmids expressing primary miRNAs (miR-9b or miR-279) or the corresponding empty vector (–), a plasmid expressing *Renilla* luciferase (R-Luc), and increasing amounts of the F-Luc-nerfin-1 reporter as indicated. Firefly luciferase activity (black bars) and mRNA levels (green bars) were normalized to that of the *Renilla* luciferase transfection control. For each condition, the normalized values of F-Luc activity and mRNA levels were set to 100 in cells transfected with the empty vector (*i.e.* in the absence of the miRNAs, only shown for the lowest amount of reporter). (b,c) S2 cells were co-transfected with a mixture of three plasmids: the F-Luc-CG11206 reporter, plasmids expressing primary miRNAs (colored bars) or the corresponding empty vector (gray bars), and a plasmid expressing *Renilla* luciferase (R-Luc). Cells were treated with cycloheximide (CHX, 10 µg/ml; SIGMA) or hippuristanol (HP, in DMSO; 4 µM final concentration) 7 hours before isolating the RNA samples. In panel (c) control cells were treated with corresponding amounts of DMSO. Firefly luciferase mRNA levels were normalized to that of the *Renilla* luciferase. The normalized values were set to 100 in the absence of miRNAs (gray bars). Mean values ± standard deviations from three independent experiments are shown.

## Supplementary Fig. 2.

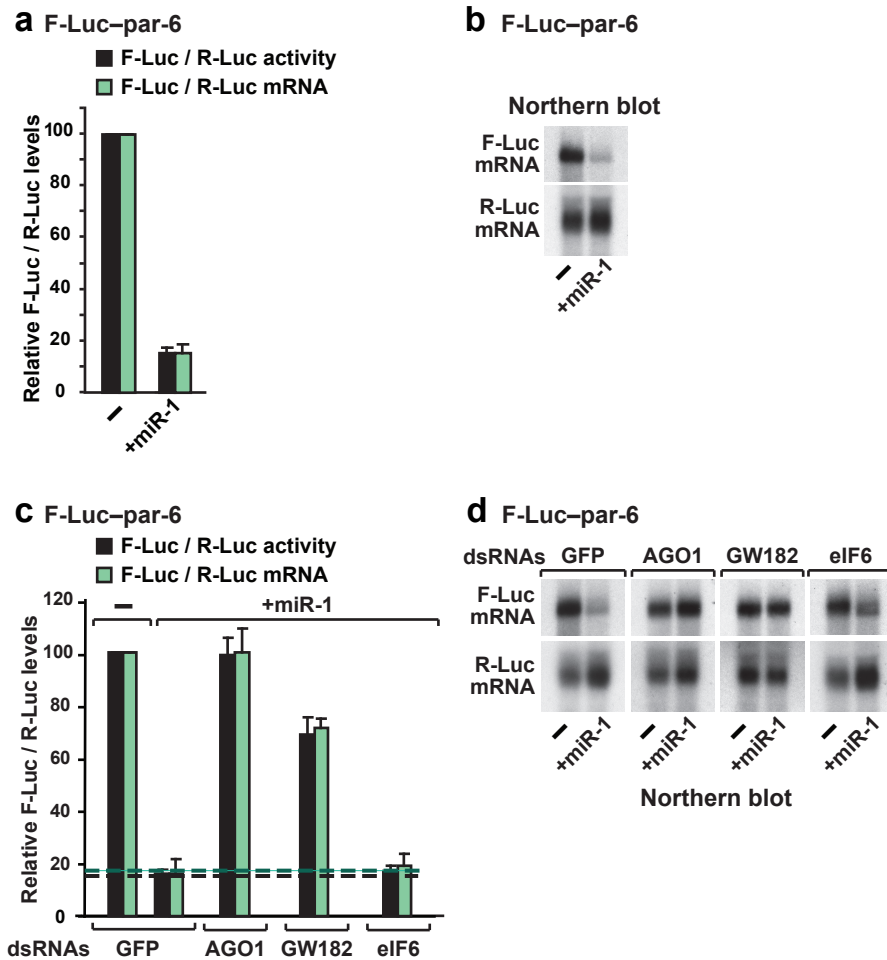

**Supplementary Figure 2** Depleting eIF6 does not prevent miRNA-mediated mRNA decay. (**a–d**) S2 cells were co-transfected with a mixture of three plasmids: the F-Luc-par-6 reporter, a plasmid expressing primary miR-1 (+) or the corresponding empty vector (-); and a plasmid expressing *Renilla* luciferase (R-Luc). In panel (**c**) cells were treated with the indicated dsRNAs on days 0 and 4, and transfected on day 6. Samples were analyzed as described in Figure 1. (**b,d**) Northern blot analysis of representative RNA samples isolated from S2 cells shown in panels (**a,c**), respectively.

### Supplementary Fig. 3.

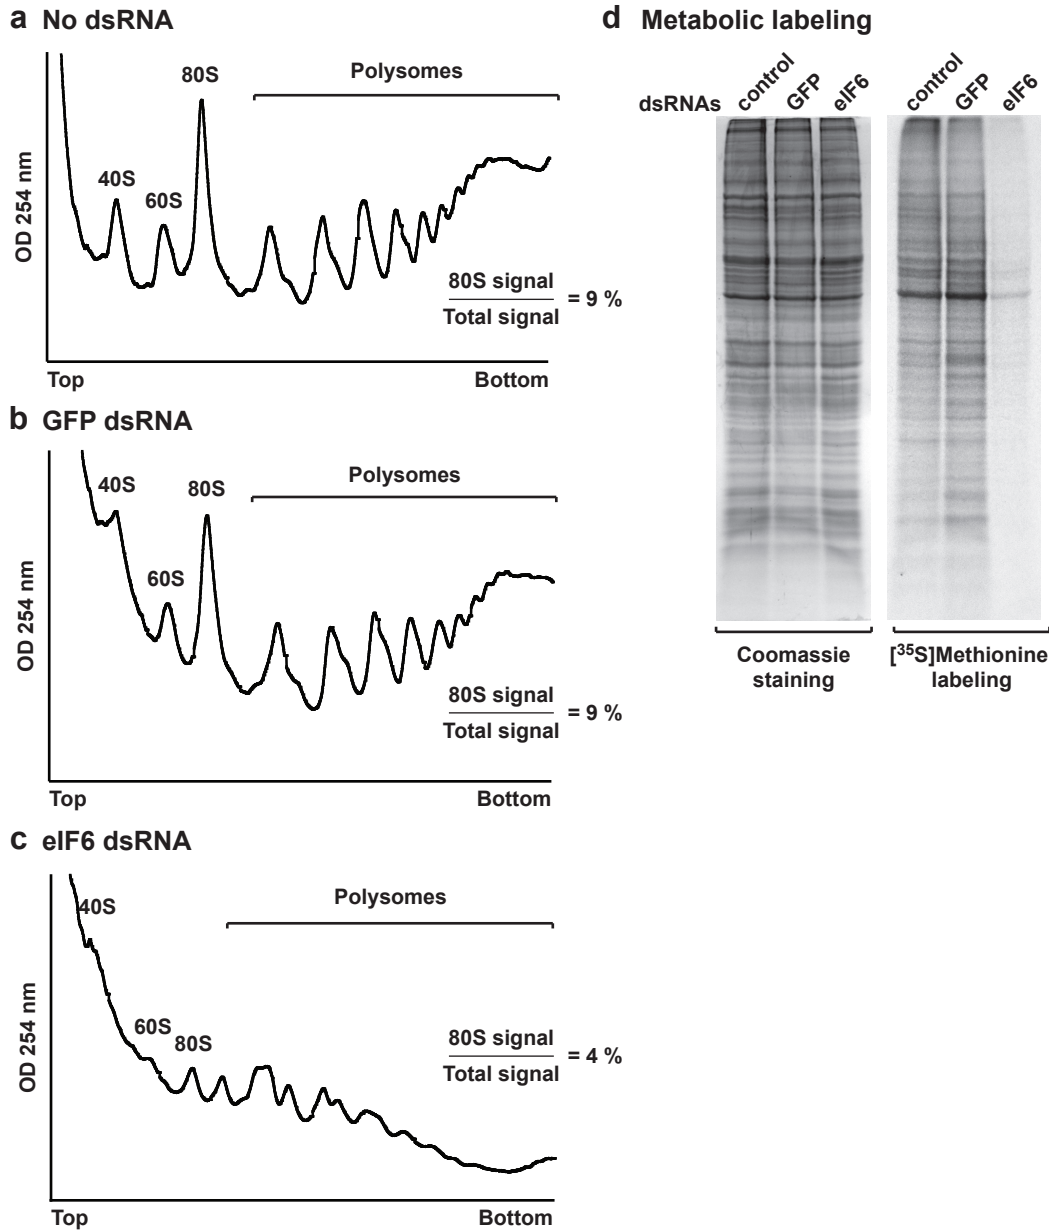

**Supplementary Figure 3** Depletion of eIF6 reduces 80S ribosome and polysome formation. (**a–d**) S2 cells were treated with a dsRNA targeting endogenous eIF6 on day 0 and day 4. GFP dsRNA served as a negative control. (**a–c**) On day 9 cells were lysed and fractionated on 15%–45% sucrose gradients. As a control, extracts from untreated cells were also analyzed. The absorbancy at 254 nm of each fraction was quantitated and normalized to the total intensity across all fractions. (**d**) An aliquot of cells collected on day 9 was pulse labeled with  $[^{35}\text{S}]$ methionine for 1 h. Total cell extracts were analyzed by SDS-PAGE followed by fluorography.

Supplementary Fig. 4.

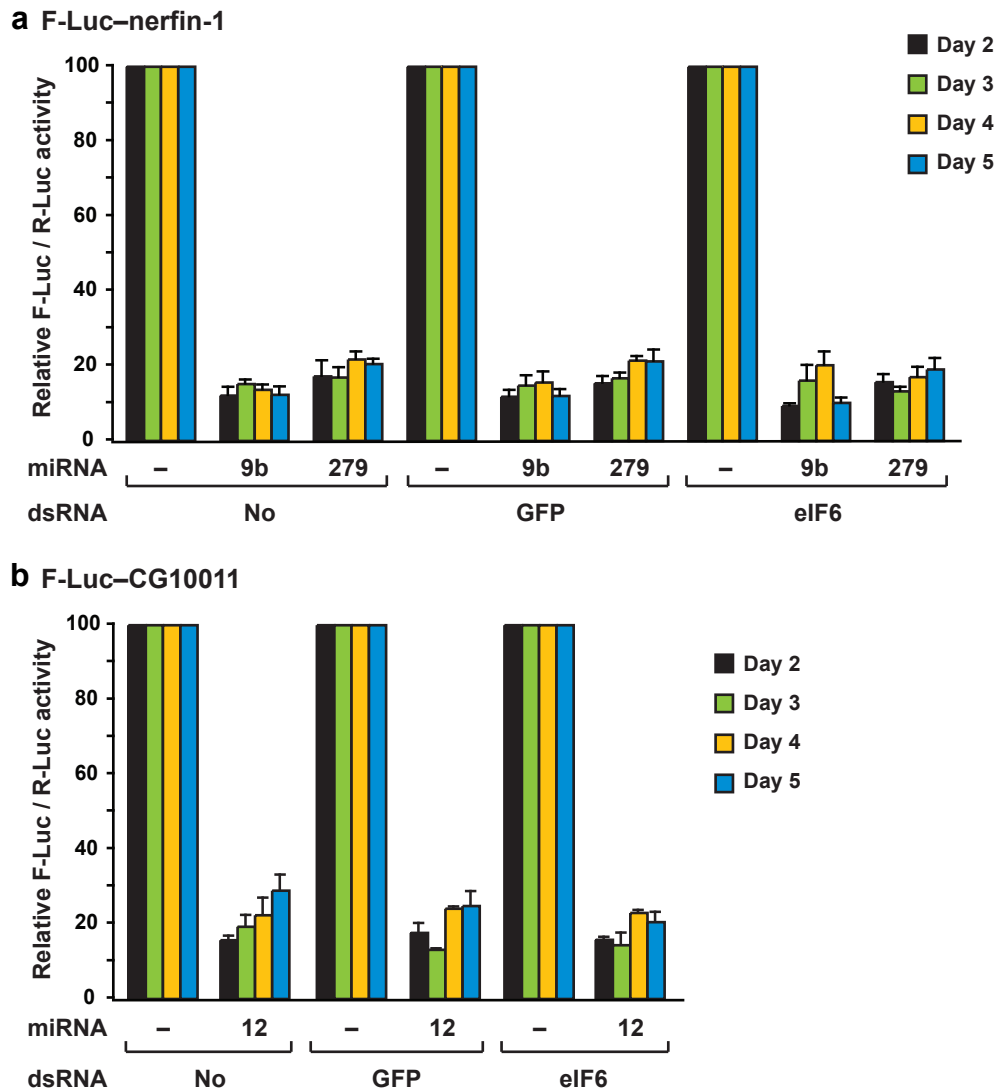

**Supplementary Figure 4** Depleting eIF6 does not prevent miRNA-mediated gene silencing. **(a,b)** S2 cells were co-transfected with a mixture of three plasmids: the indicated F-Luc reporters, a plasmid expressing primary miRNAs or the corresponding empty vector (-); and a third plasmid expressing *Renilla* luciferase (R-Luc). One day after transfection cells were treated with the indicated dsRNAs. Firefly and *Renilla* luciferase activities were measured 2, 3, 4 and 5 days after addition of dsRNAs. Firefly luciferase activity was normalized to that of the *Renilla* luciferase transfection control. For each condition, the normalized values of F-Luc activity were set to 100 in cells transfected with the empty vector [(-); *i.e.* in the absence of the miRNAs].

## Supplementary Fig. 5.

### a Titration of *D. melanogaster* AGO1 in S2 cells

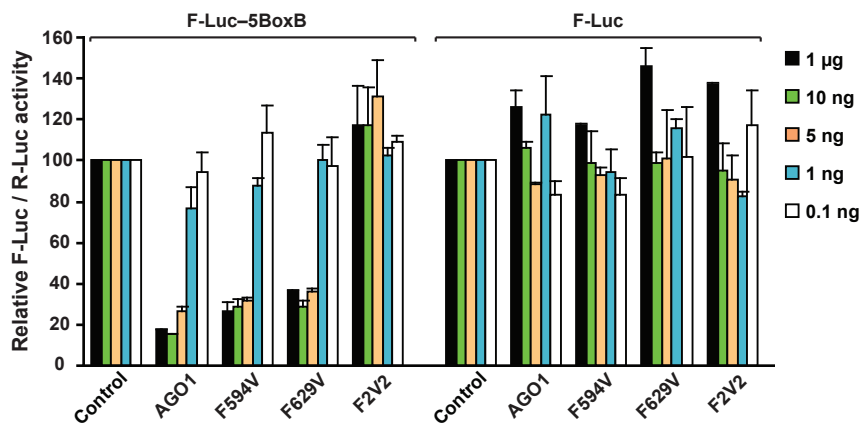

### b Titration of human AGO2 in S2 cells

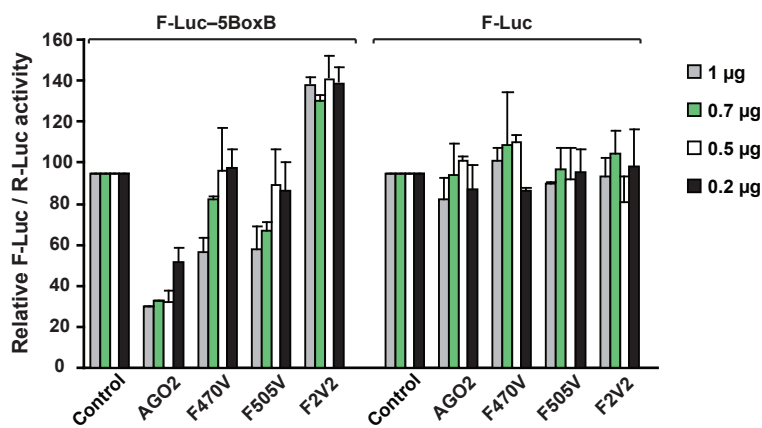

### c Tethering human AGO2 in human cells

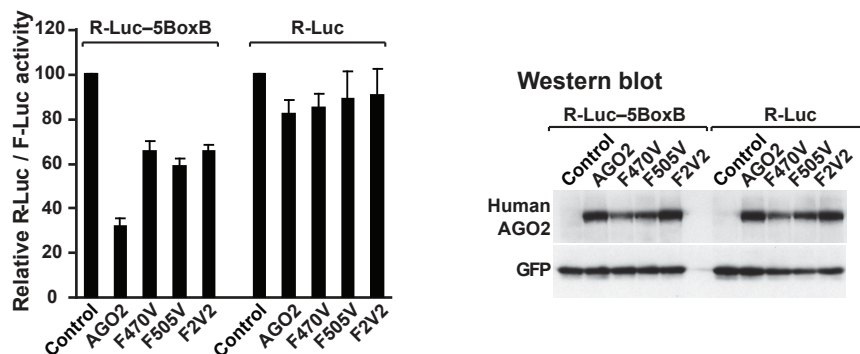

**Supplementary Figure 5** Activity of *D. melanogaster* AGO1 and human AGO2 mutants in tethering assays. (a) S2 cells were transfected with the F-Luc-5BoxB or F-Luc reporters, a plasmid expressing *Renilla* luciferase, and decreasing amounts of plasmids expressing the  $\lambda$ -N-HA-peptide (Control) or  $\lambda$ -N-HA fusions of wild-type AGO1 or AGO1 mutants as indicated. Firefly luciferase activity was normalized to that of the *Renilla* and set to 100 in cells expressing the  $\lambda$ -N-HA-peptide alone for each condition (Control bars). (b) A similar experiment as described in panel (a) was repeated with wild-type or mutated human  $\lambda$ -N-HA-AGO2 protein in S2 cells. (c) HeLa cells were transfected with the R-Luc-5BoxB or R-Luc reporters described by Pillai *et al.* (2004), a plasmid expressing firefly luciferase, and a plasmid expressing GFP. Vectors expressing the  $\lambda$ -N-HA-peptide (Control) or  $\lambda$ -N-HA fusions of wild-type AGO2 or AGO2 mutants were included in the transfection mixtures as indicated. For each reporter, *Renilla* luciferase activity was normalized to that of the firefly and set to 100 in cells expressing the  $\lambda$ -N-HA-peptide alone (Control bars). Protein expression levels were analyzed by Western blotting.

### Supplementary Fig. 6.

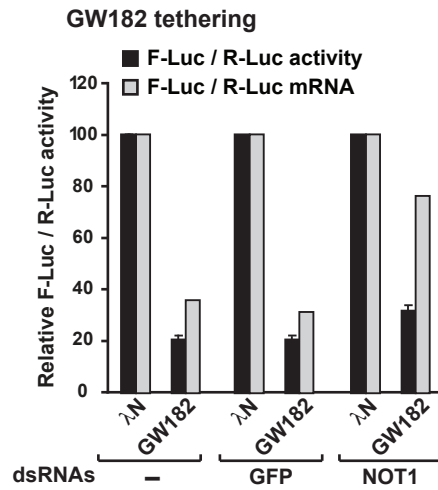

**Supplementary Figure 6** GW182 represses translation of bound mRNAs. S2 cells were treated with GFP or NOT1 dsRNAs on days 0 and 4. On day 6 cells were transfected with the F-Luc-5BoxB reporter, a plasmid expressing *Renilla* luciferase, and 5 ng of vectors expressing the  $\lambda$ N-HA-peptide or  $\lambda$ N-HA-GW182. F-Luc activities (black bars) and mRNA levels (gray bars) were quantitated and normalized to that of the *Renilla* control. In cells expressing the  $\lambda$ N-HA-peptide alone, these values were set to 100 for each knockdown.

Supplementary Table 1 - List of constructs and oligonucleotides used in this study.

| Construct                                           | Plasmid          | Cloning sites              | 5' oligos                                                              | 3' oligos                                                             |
|-----------------------------------------------------|------------------|----------------------------|------------------------------------------------------------------------|-----------------------------------------------------------------------|
| F-Luc-nerfin-1                                      | pJLuc            | gift from Steve Cohen      |                                                                        |                                                                       |
| mR-9b                                               | pAc5.1A          | EcoRI-XhoI                 | 5' CGGAATTCAGGTCAATCGTCAGAAACAATTTAAG                                  | 5' CCGCTCGAGAGACGCTGCCTCTTAGCCTTTGGCGAG                               |
| mR-279                                              | pAc5.1A          | EcoRI-XhoI                 | 5' CCGGAATTCAGAGACGCCGCTTATCAACGCTA                                    | 5' CCGCTCGAGCTCTTTTGTGCACCTGAACAGGTG                                  |
| F-Luc-CG11206                                       | pAc5.1B-F-Luc    | EcoRI-Sall                 | 5' CCGGAATTCAGTGAAAACGTAGCTAGATAGGA                                    | 5' ACGCGTCGACAGAGTTTTGATCATGGGTTATTTC                                 |
| mR-12                                               | pAc5.1A          | EcoRI-XhoI                 | 5' CGGAATTCATTTTCATTTTCGTTTTCCCTAAATTTG                                | 5' CCGCTCGAGCTGGCCATTGCGCTCCTTTAGGCTCTCCAC                            |
| F-Luc-par6                                          | pJLuc            | gift from Steve Cohen      |                                                                        |                                                                       |
| mR-1                                                | pAc5.1A          | EcoRI-XhoI                 | 5' CCGGAATTCGCCCTTTTTCCCTGCAATTACCGT                                   | 5' CCGCTCGAGATTAATGCCTGTGTGGAATGGTA                                   |
| Dm AGO1                                             | pAc5.1B-AN-HA    | Rehwinkel et al. (18)      | 5' GGGAAATTCATGTACCCATACGATGTTCCAGATTACGCTATGTCCACGGAGCGGTGAGCTGGC     | 5' CCGCTCGAGTTAGCAAAGTACATGACCTTCTTGG                                 |
| Dm AGO1 F594V                                       | pAc5.1B-AN-HA    |                            | mutagenesis oligos : 5' CGAGGATGCGCTGCCAATGTCCACCAGCAGCTGCAGAAGATC     | 5' GATCTTCTGCAGCTGCTGGGTGACATTACGCGAGCGCATCCTCG                       |
| Dm AGO1 F629V                                       | pAc5.1B-AN-HA    |                            | mutagenesis oligo: 5' CGGATCAAGTGAAACCCATGGTCCGTACCTGAAGATCACC         | 5' GGTGATCTTCAGGTAACGGACCATGGTTCCACTTGATCCG                           |
| Dm AGO1 F2V2                                        | pAc5.1B-AN-HA    |                            | mutagenesis oligos: same as for F594V and F629V                        | same as F594V and F629V                                               |
| olgos used to generate AGO1 siRNA resistant version |                  |                            | 5' CCGATTCGCAGCGCGTCAAGTTCACCAAAGAAATTAAGGCCTGAAGATCGAGATCACCCACTGCCG  | 5' CCGCAGTGGGTGATCTCGATCTCAGGCCCTTAATTTCTTTGGTGAACCTGACGCGCTCGGAATCCG |
| Human AGO2                                          | pAc5.1B-AN-HA    | EcoRI-NotI                 | 5' CCGAAATTCATGTACTCGGGAGCCG                                           | 5' TTCCCTTTTTGCGCCGCTCAAGCAAAGTACATGGTG                               |
| Human AGO2-F470V                                    | pAc5.1B-AN-HA    | EcoRI-NotI                 | mutagenesis oligos: 5' CACGGAAGTCCATCTGAAGTCCGTCCACAGACGAGCTCAGAAAGATC | 5' GATCTTCTGCAGCTGCTGTGTGACGCACTTCAGATGGACTTCCGTG                     |
| Human AGO2-F505V                                    | pAc5.1B-AN-HA    | EcoRI-NotI                 | mutagenesis oligos: 5' GCGGACAGCGTGGAGCCCATGGTCCGGCACCTGAAGAACACGTATG  | 5' CATACGTGTTCTTCAGGTGCCGGAACATGGGCTCCACGCTGTCCGC                     |
| Human AGO2-F2V2                                     | pAc5.1B-AN-HA    | EcoRI-NotI                 | mutagenesis oligos: same as for F470V and F505V                        | same as F470V and F505V                                               |
| GW182                                               | pAc5.1B-AN-HA    | HindIII-NotI               | 5' CCCAAGCTTGATGGCTTACCACATACGATGTTCCAGATTACGCTATCGGTGAAGCCCTTTTTTCCC  | 5' ATAAGAATGCGGCCGCTTAATCATCAACAATGGAATAAACGAG                        |
| GW182(1-592)                                        | pAc5.1B-AN-HA    | HindIII-EcoV               | same as GW182                                                          | 5' CTCCCAAGCTTGATGGATGGTTGGCGTCGACATG                                 |
| Renilla-V5                                          | pAc5.1A-R-Luc-V5 | KpnI-XhoI                  | 5' CGGGGTACCAACATGACTTCGAAAAGTTTATGA                                   | 5' CCCTCGAGTTGTTCAATTTTGAGAACTCGCTC                                   |
| Renilla                                             | pAc5.1A-R-Luc    | KpnI-XhoI                  | 5' CGGGGTACCAACATGACTTCGAAAAGTTTATGA                                   | 5' CCCTCGAGTCATTGTTCAATTTTGAGAACTCGCTC                                |
| Human AGO2                                          | pCI-Neo          | gift from Witec Filipowicz |                                                                        |                                                                       |
| Human AGO2-F470V                                    | pCI-Neo          |                            | mutants generated using the same oligonucleotides as above             |                                                                       |
| Human AGO2-F505V                                    | pCI-Neo          |                            |                                                                        |                                                                       |
| Human AGO2-F2V2                                     | pCI-Neo          |                            |                                                                        |                                                                       |
| T7 oligonucleotides for dsRNA synthesis             |                  |                            |                                                                        |                                                                       |
| GFP                                                 |                  |                            | 5' TTAATACGACTCACTATAGGGAGGATGGTGAAGAGGGCGAGGAG                        | 5' TTAATACGACTCACTATAGGGAGGCTTGACAGCTGCTCCATGCCG                      |
| AGO1                                                |                  |                            | 5' TTAATACGACTCACTATAGGGAGACATTAAGCTGACCGATATGC                        | 5' TTAATACGACTCACTATAGGGAGATTGACGTTGATCTTCAGACACAG                    |
| GW182                                               |                  |                            | 5' TTAATACGACTCACTATAGGGAGGAGGAGGTAACGGGTCAAGCAATATA                   | 5' TTAATACGACTCACTATAGGGAGCCGGCTATTCTTACCTACCCCGTT                    |
| eIF6                                                |                  |                            | 5' TAATACGACTCACTATAGGGCCACGTAATACAGAGAAAATG                           | 5' TAATACGACTCACTATAGGGCCCTGGTTGCTCAGCACGGCGT                         |
| NOT1                                                |                  |                            | 5' TAATACGACTCACTATAGGGAGAGCTCACTCAGCATCGCCATCG                        | 5' TAATACGACTCACTATAGGGAGAGTAGGGGAAGGCCGACACAAT                       |
